# Supplementary material
Source: PubMed Central journal article supplement (PMC6732977)
Supplement: Supplementary_Data.pdf [file Supplementary_Data.pdf]

Figure S1. Fewer circulating lin-MDSCs and monocytic MDSCs were seen in patients with gBRCAm HGSOc independent of platinum-sensitivity and prior exposure to bevacizumab but this difference was not observed in other immune cells. The percentage of lin- and monocytic MDSCs was lower in patients with gBRCAm compared with patients with BRCAwt, independent of (A and B) platinum-sensitivity or (C and D) prior exposure to bevacizumab. There was no difference in the percentage of CD8<sup>+</sup> T cells between patients with gBRCAm and patients with BRCAwt, (E and F) regardless of platinum sensitivity or (G and H) prior exposure to bevacizumab.

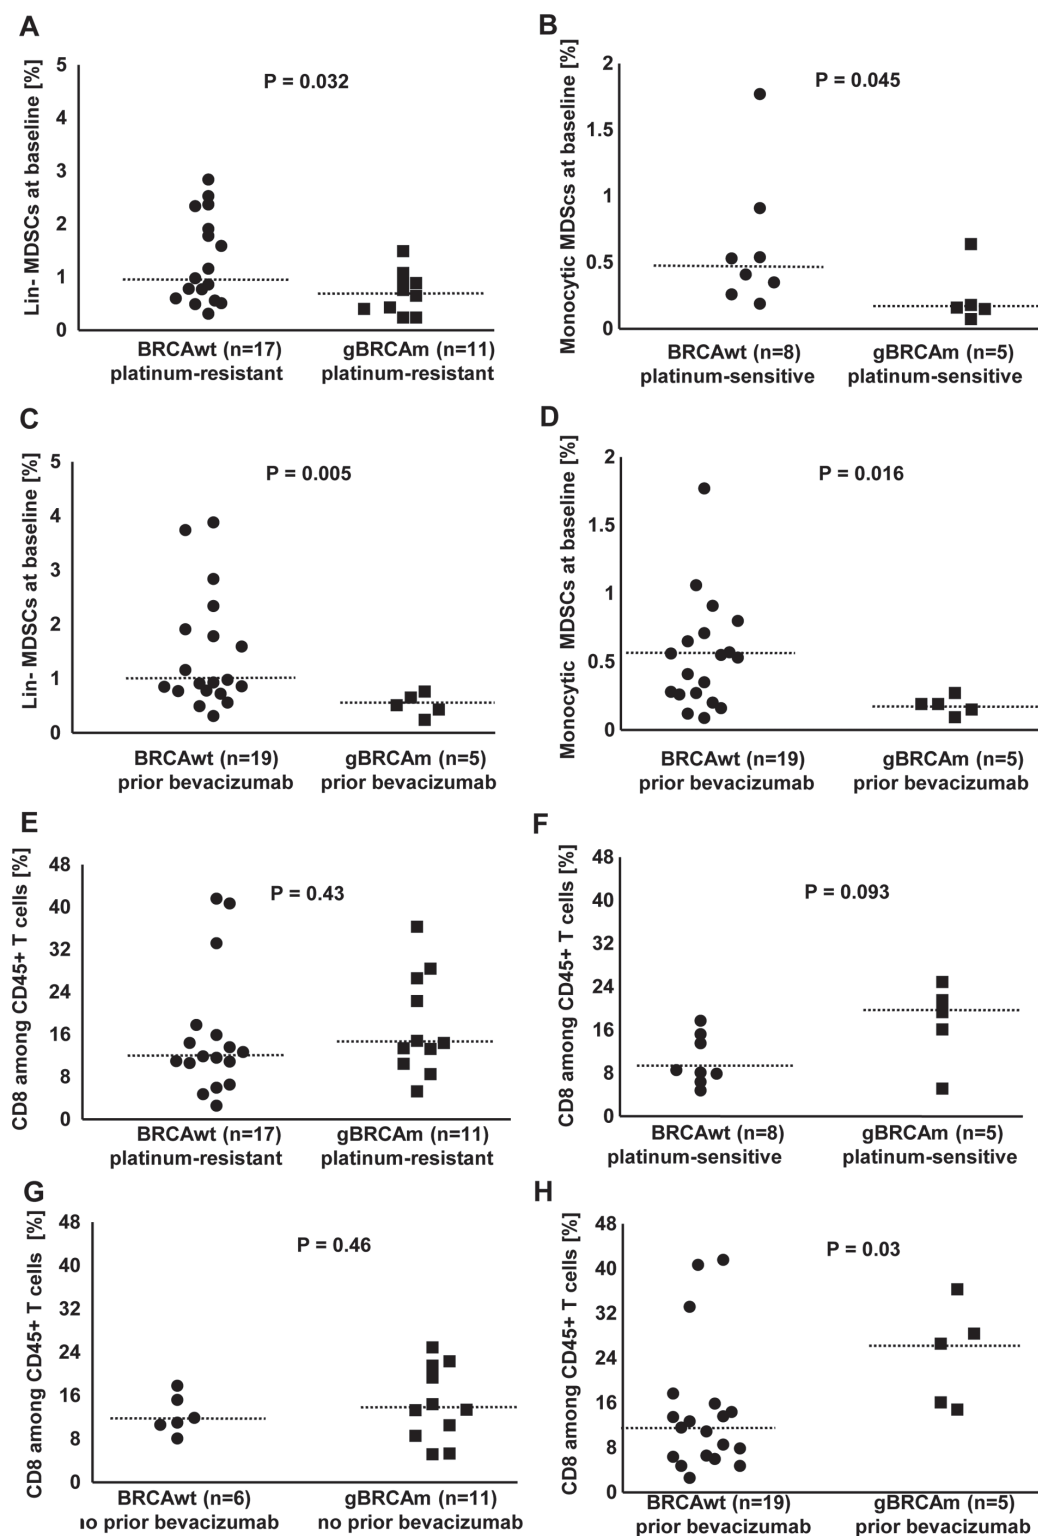

Figure S1. Continued. There was no difference in the CTLA-4 expression among CD8+ T cells between patients with gBRCAm and patients with BRCAwt, (I and J) regardless of platinum sensitivity or (K and L) prior exposure to bevacizumab. The dotted lines represent the median values. MDSCs, myeloid-derived suppressor cells; gBRCAm, germline BRCA mutation; BRCAwt, germline BRCA wild-type; MFI, Median Fluorescence Intensity; HGSOC, high-grade serous ovarian cancer; CTLA-4, cytotoxic T lymphocyte-associated protein 4.

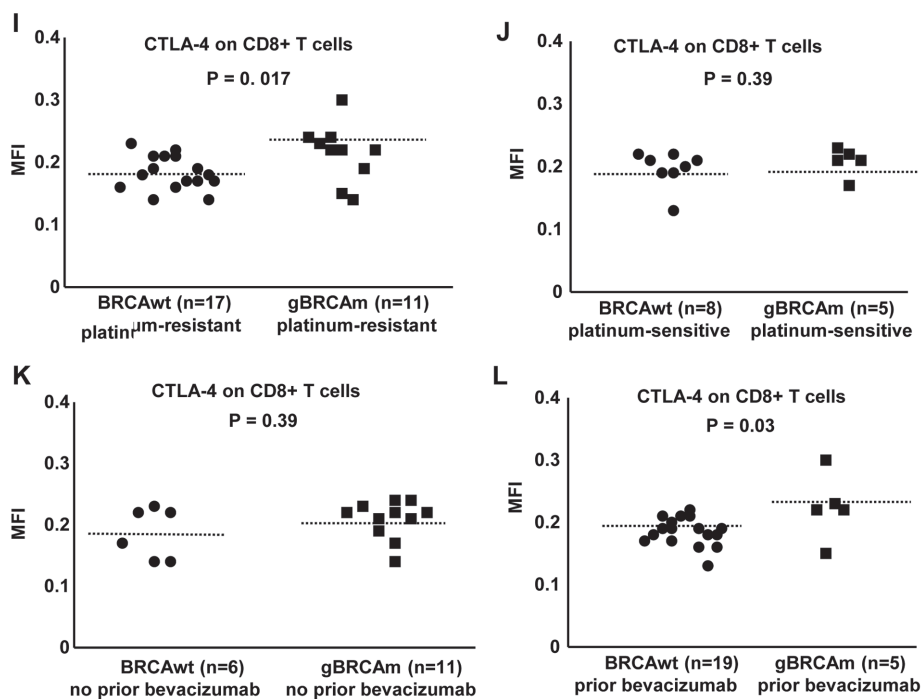

Figure S2. There was no difference in TIM-3 and PD-1 expression on CD8<sup>+</sup> T cells between patients with gBRCAm and patients with BRCAwt. (A) TIM-3 and (B) PD-1 expression on CD8<sup>+</sup> T cells was similar between patients with gBRCAm and patients with BRCAwt. (C) TIM-3 and (D) PD-1 expression on CD8<sup>+</sup> T cells was similar between patients with gBRCAm and patients with BRCAwt <5 years post-diagnosis. (E) TIM-3 and (F) PD-1 expression on CD8<sup>+</sup> T cells was similar between patients with gBRCAm and patients with BRCAwt ≥5 post-diagnosis. The dotted lines represent the median values. gBRCAm, germline *BRCA* mutation; BRCAwt, germline *BRCA* wild-type; MFI, Median Fluorescence Intensity; TIM-3, T cell immunoglobulin and mucin domain 3; PD-1, programmed cell death protein 1.

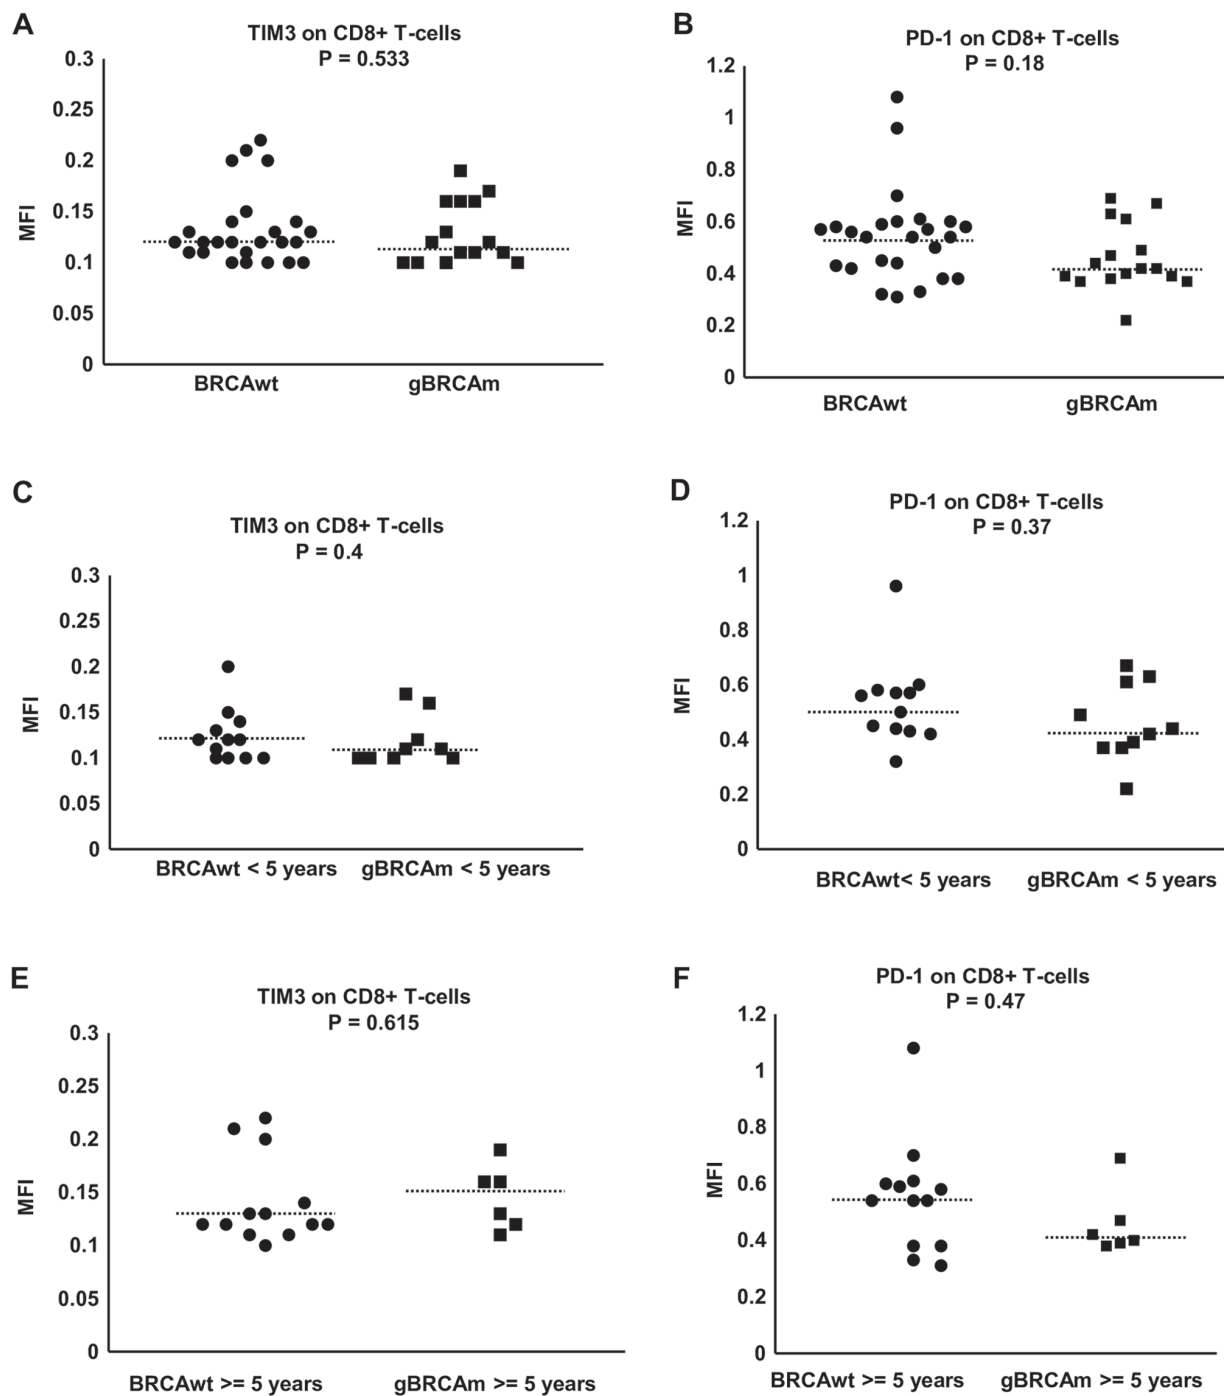

Figure S3. CTLA-4 expression on Tregs and the percentage of granulocytic MDSCs were not associated with PFS. (A) CTLA-4 expression on Tregs and (B) the percentage of MDSCs were not associated with PFS in the HGSOc cohort under study. (C) CTLA-4 expression on Tregs and (D) the percentage of MDSCs were not associated with PFS among patients with BRCAwt. (E) CTLA-4 expression on Tregs and (F) the percentage of MDSCs were not associated with PFS among patients with gBRCAm. CTLA-4, cytotoxic T lymphocyte-associated protein 4; Tregs, T regulatory cells; MDSCs, myeloid-derived suppressor cells; gBRCAm: germline *BRCA* mutation; BRCAwt, germline *BRCA* wild-type; HGSOc, high-grade serous ovarian cancer; PFS, progression-free survival.

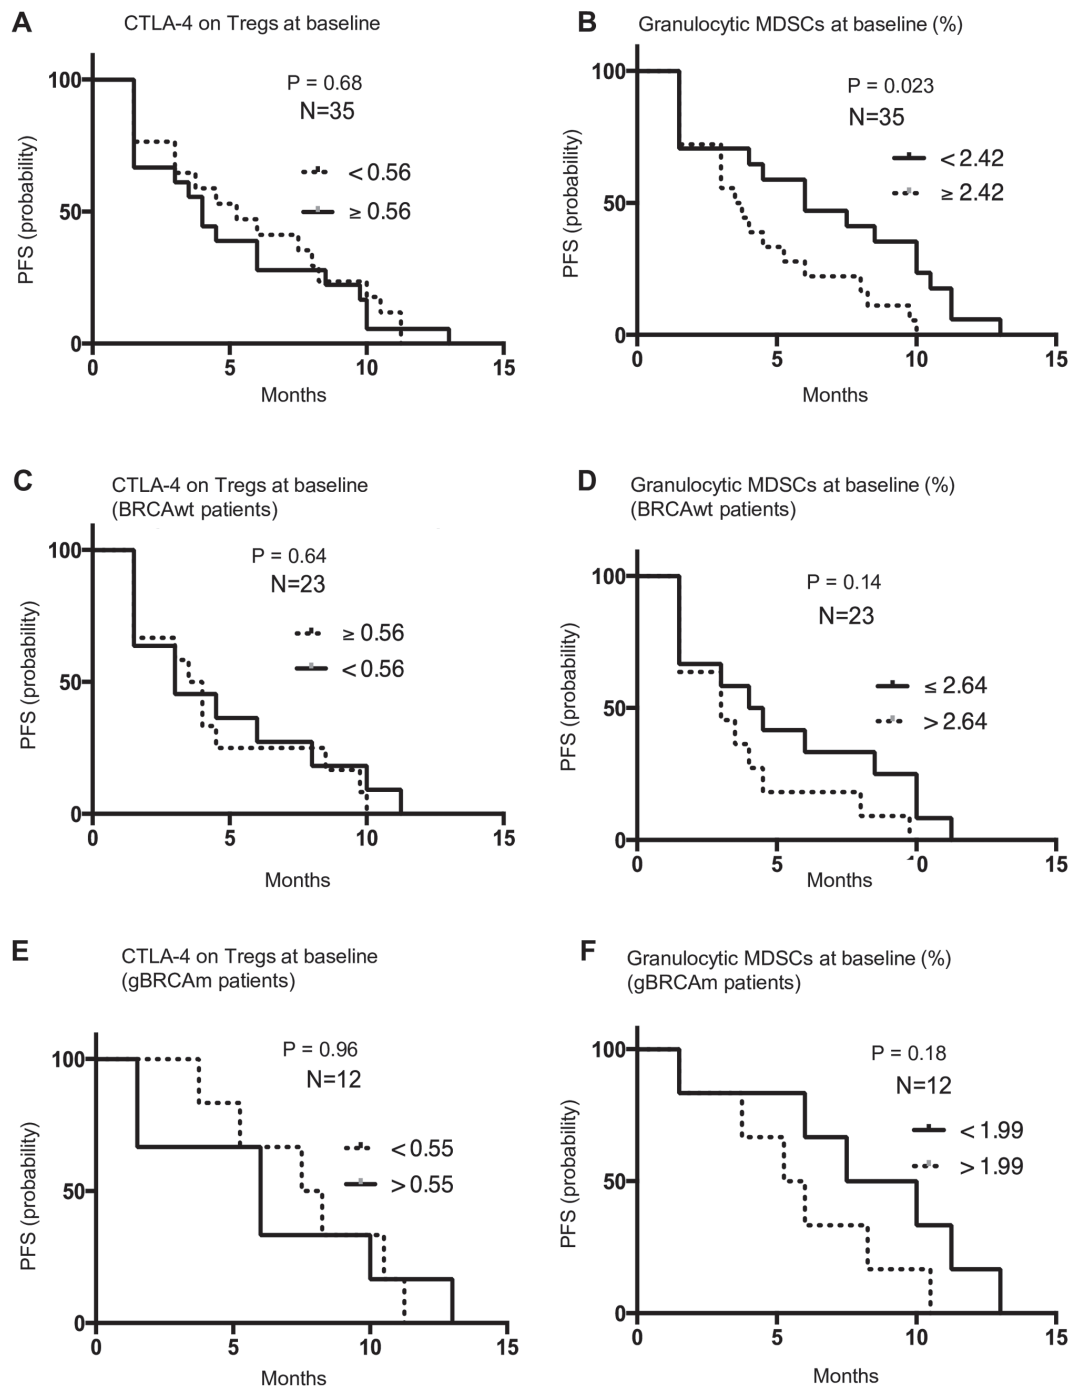

Table SI. Conjugates, catalogue numbers and dilutions used for the monoclonal antibodies in the present study.

| Target | Conjugation     | Clone    | Cat. no. | Dilution |
|--------|-----------------|----------|----------|----------|
| CD4    | PE/Cy7          | RPA-T4   | 300512   | 1:40     |
| PD-1   | APC/Cy7         | EH12.2H7 | 329922   | 1:40     |
| TIM-3  | APC             | F38-2E2  | 345012   | 1:40     |
| Foxp3  | Alexa Fluor 488 | 206D     | 320112   | 1:40     |
| CTLA-4 | PE              | L3D10    | 349906   | 1:40     |
| CD25   | PE/Cy5          | BC96     | 302608   | 1:40     |
| CD8    | Pacific Blue    | SK1      | 344718   | 1:40     |
| CD45   | APC/Cy7         | HI30     | 304014   | 1:40     |
| CD3    | Alexa Fluor 647 | OKT3     | 317312   | 1:40     |
| CD19   | Alexa Fluor 647 | HIB19    | 302220   | 1:40     |
| CD56   | Alexa Fluor 647 | MEM-188  | 304612   | 1:40     |
| CD40   | Pacific Blue    | 5C3      | 334320   | 1:100    |
| CD14   | PerCP/Cy5.5     | HCD14    | 325622   | 1:40     |
| HLA-DR | PE/Cy7          | L243     | 307616   | 1:40     |
| CD11b  | Alexa Fluor 488 | ICRF44   | 301318   | 1:40     |
| CD33   | PE              | WM53     | 303404   | 1:40     |

Table SII. Immune subsets and functional markers.

| Immune subset                               | Phenotype                                                                                                                       | Functional markers |
|---------------------------------------------|---------------------------------------------------------------------------------------------------------------------------------|--------------------|
| CD4 <sup>+</sup> T lymphocytes              | CD8 <sup>-</sup> CD4 <sup>+</sup>                                                                                               | PD-1, CTLA-4       |
| CD8 <sup>+</sup> T lymphocytes              | CD8 <sup>+</sup> CD4 <sup>-</sup>                                                                                               | TIM-3, PD-1        |
| Regulatory T cells                          | CD8 <sup>-</sup> CD4 <sup>+</sup> CD25 <sup>high</sup> Foxp3 <sup>+</sup>                                                       | PD-1, CTLA-4       |
| Foxp3 <sup>-</sup> CD4 <sup>+</sup> T cells | CD8 <sup>-</sup> CD4 <sup>+</sup> Foxp3 <sup>-</sup>                                                                            | PD-1, CTLA-4       |
| Immune suppressive monocytes                | CD14 <sup>+</sup> HLA-DR <sup>low/neg</sup>                                                                                     | HLA-DR             |
| MDSCs phenotypes                            |                                                                                                                                 |                    |
| Lineage-MDSCs                               | CD3 <sup>-</sup> CD19 <sup>-</sup> CD56 <sup>+</sup> HLA-DR <sup>-</sup> CD11b <sup>+</sup> CD33 <sup>+</sup>                   | CD40               |
| Monocytic MDSCs                             | CD3 <sup>-</sup> CD19 <sup>-</sup> CD56 <sup>+</sup> HLA-DR <sup>-</sup> CD11b <sup>+</sup> CD33 <sup>+</sup> CD14 <sup>+</sup> | CD40               |
| Immature MDSCs                              | CD3 <sup>-</sup> CD19 <sup>-</sup> CD56 <sup>+</sup> HLA-DR <sup>-</sup> CD11b <sup>+</sup> CD33 <sup>+</sup> CD14 <sup>-</sup> | CD40               |
| Granulocytic MDSCs                          | CD11b <sup>+</sup> CD33 <sup>+</sup> CD14 <sup>-</sup>                                                                          | CD40               |

The following monoclonal antibodies (18) were used: Pacific Blue-CD8 clone SK1, PE-Cy7-CD4 clone RPA-T4, PE-Cy5-CD25 clone BC96, and Alexa Fluor 488-Foxp3 clone 206D, APC-Cy7-PD-1 clone EH12.2H7, PE-CTLA-4 clone L3D10, and APC-Tim-3 clone F38-2E2 were used for T cells. For monocyte analysis, APC-Cy7-CD45 clone HI30, PE-Cy7-HLA-DR clone L243, PerCP-CD14 clone HCD14 were used. For MDSCs, APC-Cy7-CD45 clone HI30, Alexa Fluor 647-CD3 clone OKT3, Alexa Fluor 647-CD56 clone MEM-188, Alexa Fluor 647-CD19 clone HIB19, PE-Cy7-HLA-DR clone L243, PerCP-CD14 clone HCD14, Alexa Fluor 488 CD11b clone ICRF44, PE-CD33 clone WM53, and Pacific Blue-CD40 clone 5C3 were used. For analysis of Foxp3 expression, cells were fixed and permeabilized using a Fix/Perm buffer (eBioscience) according to the manufacturer's instructions, then labeled with anti-Foxp3 antibody. MDSCs, myeloid-derived suppressor cells.
